# Supplementary material for: Phosphorylation of CaMK and CREB-Mediated Cardiac Aldosterone Synthesis Induced by Arginine Vasopressin in Rats with Myocardial Infarction
Source: MDPI journal article supplement (doi:10.3390/ijms232315061), 2022-12-01
Supplement: s1 [file s1]

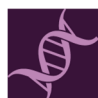

Supplementary

# Phosphorylation of CaMK and CREB-Mediated Cardiac Aldosterone Synthesis Induced by Arginine Vasopressin in Rats with Myocardial Infarction

Yuan-Sheng Zhai <sup>1,2,†</sup>, Jie Li <sup>1,2,†</sup>, Longyun Peng <sup>1,2</sup>, Guihua Lu <sup>1,2</sup>, and Xiuren Gao <sup>1,2,\*</sup>

<sup>1</sup> Department of Cardiology, the First Affiliated Hospital, Sun Yat-Sen University, Guangzhou 510800, China

<sup>2</sup> Key Laboratory on Assisted Circulation, Ministry of Health, Guangzhou 510800, China

† These authors contribute equally to the work.

\* Correspondence: gaoxr@mail.sysu.edu.cn; Tel.: +86-020-82394178

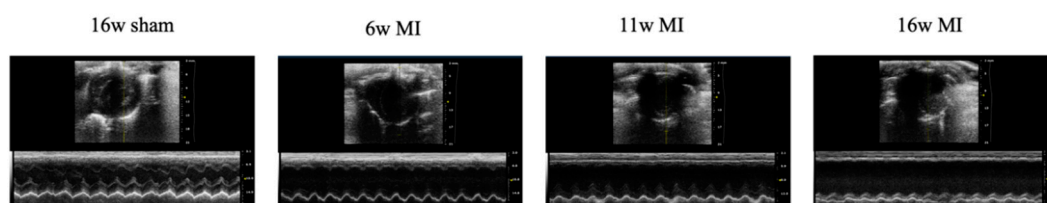

**Figure S1.** Representative M-mode echocardiographic images of rats. 16w sham, 16-week post-sham-operation group; 6w MI, 6-week post-infarction group; 11w MI, 11-week post-infarction group; 16w MI, 16-week post-infarction group.

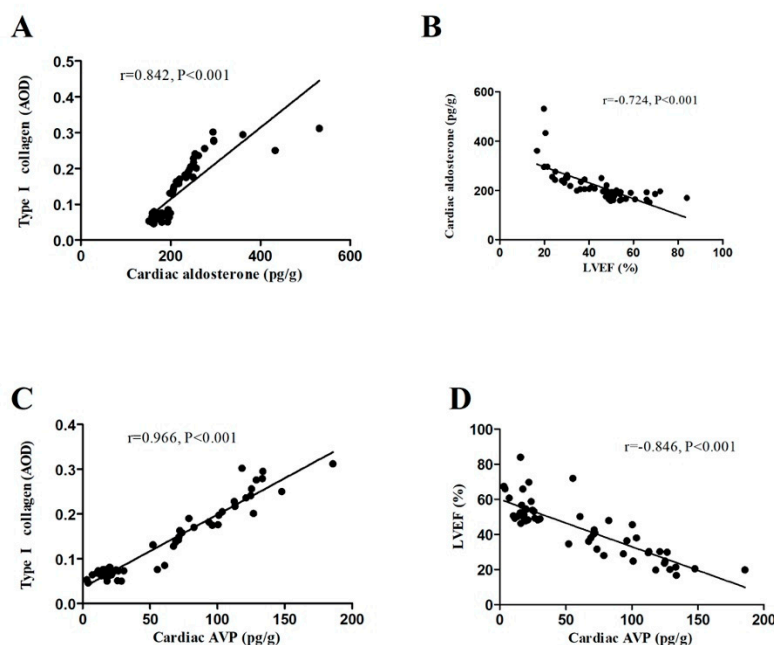

**Figure S2.** Correlation analyses among the rats. LVEF, left ventricular ejection fraction. A: Correlation analysis between aldosterone and type I collagen expression. B: Correlation analysis between aldosterone and LVEF. C: Correlation analysis between AVP and type I collagen expression. D: Correlation analysis between AVP and LVEF.
